# Supplementary material
Source: Research Square preprint supplement (doi:10.21203/rs.3.rs-8937175/v1)
Supplement: Supplementary file 1 [file 82d08e6bb499a33936fae359.docx]

**Supplement Figure 1:** Sample size calculation

| ***Alfa=*** | **0.05** | ***Z1-a/2=*** | **1.961150826** |
| --- | --- | --- | --- |
| ***Beta=*** | **0.2** | ***Z1-B=*** | **0.841623031** |
| ***μ1=*** | **7.3** |  |  |
| ***μ2=*** | **5.1** |  |  |
| ***SD1=*** | ***2.3*** |  |  |
| ***SD2=*** | ***1.9*** | ***n=*** | ***15*** |

**Supplement Table 1:** Balanced block randomization for the first surgery

| block identifier | block size | sequence within block | treatment |
| --- | --- | --- | --- |
| 1 | 4 | 1 | Group A |
| 1 | 4 | 2 | Group A |
| 1 | 4 | 3 | Group B |
| 1 | 4 | 4 | Group B |
| 2 | 4 | 1 | Group A |
| 2 | 4 | 2 | Group B |
| 2 | 4 | 3 | Group A |
| 2 | 4 | 4 | Group A |
| 3 | 4 | 1 | Group B |
| 3 | 4 | 2 | Group A |
| 3 | 4 | 3 | Group A |
| 3 | 4 | 4 | Group B |
| 4 | 4 | 1 | Group A |
| 4 | 4 | 2 | Group A |
| 4 | 4 | 3 | Group B |
| 4 | 4 | 4 | Group B |
